# Supplementary material for: Stress mitigation by riparian flora in industrial contaminated area of River Chenab Punjab, Pakistan
Source: PeerJ. 2023 Jun 28;11:e15565. doi: 10.7717/peerj.15565 (PMC10314743; doi:10.7717/peerj.15565)
Supplement: Supplemental Information 1 [file peerj-11-15565-s001.xls]

## Sheet: March
Sr. No.	Habitat
		Cd	Cr ppm	Cu	Fe	Mn	Ni	Pb	Zn
		ppm		ppm	ppm	ppm	ppm	ppm	ppm
WS1	River site 1	0.0118	0.00512	0.02354	0.77564	0.00985	0.04476	0.012456	0.26214
	Chenabnagar
WS2	Marah Chiniot drain1	0.2087	0.00895	0.08457	1.23414	0.09877	0.09745	0.07954	0.97654
WS3	River site 2 Chiniot	0.19	0.00799	0.06432	0.54321	0.023421	0.03877	0.04465	0.57643
WS4	River site 3 Chiniot	0.1877	0.00785	0.04539	0.39542	0.021456	0.0216	0.046321	0.443511
WS5	Paharang drain Drain2	0.01457	0.02348	0.09124	0.99658	0.04696	0.09675	0.067541	0.86247
WS6	River site 4 Bhawana	0.01324	0.02165	0.06532	0.65772	0.03466	0.07234	0.03489	0.71222
WS7	River site 5 Bhawana	0.01233	0.02149	0.03456	0.43211	0.032145	0.04567	0.03011	0.51231
WS8	Ahmad wala Drain3	0.03625	0.02356	0.07625	0.89574	0.02654	0.09712	0.07625	0.77854
WS9	River site 6 Jhang	0.03476	0.00334	0.01387	0.45871	0.024321	0.05488	0.04529	0.44786
WS10	River site 7 Jhang	0.01185	0.00293	0.01298	0.32954	0.02587	0.03291	0.01896	0.44267

## Sheet: june
Sr. No.	Habitat
		Cd	Cr ppm	Cu	Fe	Mn	Ni	Pb	Zn
		ppm		ppm	ppm	ppm	ppm	ppm	ppm
WS1	River site 1	0.0115	0.00531	0.02435	0.7495	0.01187	0.04295	0.00957	0.2788
	Chenabnagar
WS2	Marah Chiniot drain1	0.2165	0.00785	0.08567	0.99871	0.03056	0.07843	0.04876	0.94344
WS3	River site 2 Chiniot	0.1344	0.004576	0.05512	0.4567	0.020348	0.054671	0.03421	0.6674
WS4	River site 3 Chiniot	0.1187	0.002341	0.03213	0.30986	0.012893	0.03722	0.03234	0.54211
WS5	Paharang drain Drain2	0.2298	0.01965	0.06235	1.11285	0.03363	0.0724	0.045678	0.92145
WS6	River site 4 Bhawana	0.1458	0.01167	0.06067	0.78652	0.01234	0.06012	0.03024	0.71239
WS7	River site 5 Bhawana	0.1278	0.01099	0.05978	0.91234	0.01176	0.05044	0.02876	0.4561
WS8	Ahmad wala Drain3	0.02698	0.01965	0.03965	0.89547	0.02875	0.08457	0.05564	0.63145
WS9	River site 6 Jhang	0.01022	0.011987	0.01457	0.4456	0.01432	0.04466	0.02765	0.54155
WS10	River site 7 Jhang	0.09768	0.010231	0.01298	0.3295	0.01187	0.02374	0.01987	0.43265

## Sheet: September
Sr. No.	Habitat
		Cd	Cr ppm	Cu	Fe	Mn	Ni	Pb	Zn
		ppm		ppm	ppm	ppm	ppm	ppm	ppm
WS1	River site 1	0.101	0.00523	0.02636	0.6491	0.01078	0.04095	0.00757	0.2156
	Chenabnagar
WS2	Marah Chiniot drain1	0.2265	0.0078	0.08067	1.01345	0.02934	0.07644	0.04976	0.89349
WS3	River site 2 Chiniot	0.1289	0.0045	0.04923	0.4065	0.02239	0.05843	0.03329	0.6534
WS4	River site 3 Chiniot	0.129	0.00231	0.03321	0.29986	0.01238	0.03629	0.03467	0.5288
WS5	Paharang drain Drain2	0.2377	0.01967	0.072	1.10281	0.03466	0.07288	0.04467	0.90231
WS6	River site 4 Bhawana	0.1543	0.01089	0.06077	0.76542	0.02348	0.06122	0.02934	0.87231
WS7	River site 5 Bhawana	0.1345	0.01024	0.05966	0.91287	0.01133	0.05044	0.02876	0.4677
WS8	Ahmad wala Drain3	0.02544	0.01876	0.04002	0.88543	0.02755	0.08057	0.05669	0.64138
WS9	River site 6 Jhang	0.01189	0.01222	0.01456	0.42714	0.01421	0.04485	0.02632	0.55671
WS10	River site 7 Jhang	0.07234	0.01199	0.01234	0.3376	0.01189	0.02343	0.01765	0.42235

## Sheet: December
Sr. No.	Habitat
		Cd	Cr ppm	Cu	Fe	Mn	Ni	Pb	Zn
		ppm		ppm	ppm	ppm	ppm	ppm	ppm
WS1	River site 1	0.0121	0.00488	0.02004	0.7089	0.00721	0.039217	0.010241	0.16721
	Chenabnagar
WS2	Marah Chiniot drain1	0.2197	0.00921	0.09234	1.24991	0.09547	0.08879	0.09123	0.9435
WS3	River site 2 Chiniot	0.18231	0.00673	0.06123	0.52781	0.02099	0.03541	0.04089	0.58774
WS4	River site 3 Chiniot	0.14321	0.007001	0.04576	0.4159	0.02143	0.02317	0.043921	0.40351
WS5	Paharang drain Drain2	0.01259	0.01948	0.08024	0.87658	0.04356	0.08172	0.07751	0.81267
WS6	River site 4 Bhawana	0.01029	0.0196	0.06137	0.65272	0.03066	0.07434	0.03081	0.57222
WS7	River site 5 Bhawana	0.01034	0.02449	0.03656	0.41291	0.03315	0.04267	0.03621	0.39291
WS8	Ahmad wala Drain3	0.03126	0.02159	0.07025	0.71957	0.01254	0.09092	0.07325	0.67854
WS9	River site 6 Jhang	0.03417	0.00294	0.01187	0.38871	0.029621	0.050898	0.04921	0.42786
WS10	River site 7 Jhang	0.00915	0.00263	0.017798	0.31294	0.02457	0.03129	0.01796	0.41265
