# Supplementary material for: Stress mitigation by riparian flora in industrial contaminated area of River Chenab Punjab, Pakistan
Source: PeerJ. 2023 Jun 28;11:e15565. doi: 10.7717/peerj.15565 (PMC10314743; doi:10.7717/peerj.15565)
Supplement: Supplemental Information 2 [file peerj-11-15565-s002.xls]

## Sheet: March
Site Name	Name of plant	Metals
Season March		Cd	Cr	Cu	Fe	Mn	Ni	Pb	Zn
		ppm	ppm	ppm	ppm	ppm	ppm	ppm	ppm
Chanabnagar River site 1 non-polluted	Calotropis procera	0.065854	0.015426	1.56295	1.15248	0.20125	0.75418	0.119	0.58765
	Eclipta alba	0.05625	0.02835	0.26544	1.76296	0.07237	0.25964	0.30944	1.23658
	Phyla nodiflora	0.05215	0.03965	0.19874	1.99659	0.09055	0.20544	0.72366	1.85467
	Ranunculus sceleratus	0.07785	0.04486	0.19584	1.82344	0.09345	0.39645	0.28965	1.39548
Marah drain Site 2	Calotropis procera	0.09654	0.02196	0.95873	0.88741	0.09321	0.98567	0.16524	1.33988
	Eclipta alba	0.15249	0.10846	0.82135	3.74879	0.236589	0.52147	0.98534	1.45879
	Phyla nodiflora	0.22154	0.12354	0.70845	3.18546	0.09845	0.88457	1.23654	2.15466
	Ranunculus sceleratus	0.12548	0.089741	0.99477	2.15481	0.08979	0.88451	0.78411	1.65421
River site 2	Calotropis procera	0.03645	0.12036	0.425	0.34265	0.092564	0.56846	0.006589	0.88569
	Eclipta alba	0.12344	0.09876	0.77654	2.22786	0.20987	0.4321	0.5412	1.23564
	Phyla nodiflora	0.13438	0.10901	0.65423	2.12354	0.044567	0.50981	0.3395	1.12387
	Ranunculus sceleratus	0.10987	0.07654	0.54333	2.1119	0.06087	0.56781	0.21544	1.09658
River site 3	Calotropis procera	0.023568	0.102036	0.36524	0.322265	0.090884	0.59888	0.004256	0.75648
	Eclipta alba	0.10987	0.09685	0.06748	2.10564	0.18547	0.36541	0.48754	1.16542
	Phyla nodiflora	0.11234	0.09874	0.056421	2.11487	0.0413654	0.58471	0.34215	1.11451
	Ranunculus sceleratus	0.08745	0.078549	0.5636	2.89745	0.045874	0.54871	0.22541	1.12398
Paharang drain site	Calotropis procera	0.01847	0.00242	0.81046	0.41975	0.11255	0.20125	0.04208	0.82164
	Eclipta alba	0.005647	0.087402	0.05426	0.57421	0.10256	0.15426	0.14265	0.874662
	Phyla nodiflora	0.002359	0.0544462	0.0556662	1.22225	0.045258	0.4621	0.29532	0.88591
	Ranunculus sceleratus	0.072035	0.061235	0.225301	1.20358	0.031206	0.58777	0.11624	0.712041
River site 4	Calotropis procera	0.013265	0.002154	0.54269	0.029506	0.09856	0.16502	0.040237	0.45666
	Eclipta alba	0.0056428	0.0802233	0.041902	0.4213	0.007321	0.11032	0.103	0.36254
	Phyla nodiflora	0.001429	0.036254	0.0337232	1.01126	0.041112	0.63256	0.13299	0.44598
	Ranunculus sceleratus	0.049253	0.0467235	0.102032	0.9564	0.026503	0.42023	0.00886	0.37037
	Calotropis procera	0.012031	0.0013265	0.46253	0.026531	0.10236	0.16536	0.02954	0.3412
River site 5	Eclipta alba	0.002653	0.056234	0.036254	0.77802	0.0055237	0.002999	0.22451	0.43261
	Phyla nodiflora	0.001028	0.039503	0.035203	1.15203	0.0452	0.38203	0.11444	0.36542
	Ranunculus sceleratus	0.041098	0.92531	0.0077598	0.59524	0.021032	0.311126	0.090235	0.41206
Ahmed wala drain	Calotropis procera	0.0012635	0.0056428	0.91222	0.075894	0.24569	0.26534	0.056238	0.965874
	Eclipta alba	0.19546	0.03133	0.39655	2.96544	0.19564	0.79648	0.85624	1.62548
	Phyla nodiflora	0.25641	0.21548	0.89561	3.35715	0.14568	0.96258	1.26514	2.60215
	Ranunculus sceleratus	0.23521	0.056215	1.10236	2.62451	0.123687	0.52154	0.85614	1.95461
River site 6	Calotropis procera	0.001025	0.016452	0.4589	0.038526	0.12032	0.14042	0.012589	0.66542
	Eclipta alba	0.13245	0.028254	0.31458	2.1149	0.14597	0.74156	0.80254	1.2145
	Phyla nodiflora	0.03254	0.05562	0.2295	2.10658	0.06935	0.12054	0.3475	1.00455
	Ranunculus sceleratus	0.089564	0.076548	0.31455	2.10456	0.078451	0.32457	0.42501	1.12374
River site 7	Calotropis procera	0.00114	0.013265	0.265333	0.021369	0.102365	0.110222	0.012347	0.502023
	Eclipta alba	0.11289	0.021321	0.26544	2.03564	0.12451	0.45689	0.72153	1.10054
	Phyla nodiflora	0.029315	0.042567	0.19554	2.12456	0.04456	0.10987	0.312224	1.00215
	Ranunculus sceleratus	0.08347	0.06715	0.29645	2.00365	0.06695	0.31846	0.28208	1.09658

## Sheet: June
Site Name	Name of plant	Metals
Season June		Cd	Cr	Cu	Fe	Mn	Ni	Pb	Zn
		ppm	ppm	ppm	ppm	ppm	ppm	ppm	ppm
Chanabnagar River site 1 non-polluted	Calotropis procera	0.065248	0.01259	0.56489	0.87451	0.126554	0.79546	0.25326	0.88564
	Eclipta alba	0.065897	0.008954	0.266669	0.985677	0.142333	0.655548	0.30944	0.96565
	Phyla nodiflora	0.03219	0.00269	1.12331	0.865956	0.17264	0.34562	0.009623	0.232323
	Ranunculus sceleratus	0.045269	0.026534	0.123654	0.886574	0.065423	0.932354	0.21321	0.877756
Marah drain Site 2	Calotropis procera	0.00236	0.00254	0.8925	0.65326	0.18524	0.16254	0.055022	0.80233
	Eclipta alba	0.17689	0.12346	0.98765	3.8965	0.21234	0.78654	1.2134	2.11234
	Phyla nodiflora	0.26541	0.21564	0.86542	3.24514	0.10564	0.23154	0.666698	1.03212
	Ranunculus sceleratus	0.112444	0.0086548	0.995658	1.20002	0.086545	0.965656	0.655554	0.86584
River site 2	Calotropis procera	0.0010232	0.0010254	0.9658	0.32154	0.10236	0.11299	0.02412	0.2653
	Eclipta alba	0.002564	0.14291	0.7712	2.5624	0.15234	0.52145	0.99887	1.29999
	Phyla nodiflora	0.21555	0.13265	0.4256	1.5648	0.0023654	0.54215	1.10003	1.20364
	Ranunculus sceleratus	0.112999	0.05574	0.98989	1.67775	0.10023	0.94512	0.542369	0.86545
River site 3	Calotropis procera	0.0012365	0.006254	0.56425	0.23654	0.100236	0.46465	0.26236	0.542565
	Eclipta alba	0.141414	0.132157	0.525254	2.9998	0.19598	0.742557	1.65656	2.12125
	Phyla nodiflora	0.213327	0.421365	0.426546	3.46266	0.00995645	0.211236	0.695648	1.42517
	Ranunculus sceleratus	0.425156	0.0052524	0.878745	1.36981	0.0951357	0.98753	0.352654	0.541236
Paharang drain site	Calotropis procera	0.114257	0.0564251	1.21036	0.965965	0.102315	1.23655	0.213564	1.56235
	Eclipta alba	0.0056569	0.0023654	1.23699	2.65458	0.426515	0.202326	1.20458	1.42515
	Phyla nodiflora	0.365636	0.007225	0.262354	3.42515	0.126598	0.812365	1.45265	2.45545
	Ranunculus sceleratus	0.29365	0.125648	1.20006	2.45125	0.112983	0.986598	0.123654	1.88057
River site 4	Calotropis procera	0.102365	0.0023654	0.565648	0.856875	0.12356	1.21865	0.191956	1.52365
	Eclipta alba	0.0052524	0.0025326	1.11124	1.20236	0.342361	0.153142	1.1013	1.21294
	Phyla nodiflora	0.139658	0.0025345	0.42569	2.25252	0.142154	0.263545	1.23627	1.96955
	Ranunculus sceleratus	0.534587	0.118877	0.995698	2.86467	0.142366	0.956487	0.110235	1.10237
	Calotropis procera	0.006565	0.0452365	0.965696	0.669985	0.00562365	0.965697	0.163265	0.696954
River site 5	Eclipta alba	0.0023654	0.00212125	0.653655	1.56452	0.263562	0.153265	0.865959	0.895648
	Phyla nodiflora	0.126354	0.01685	0.242456	2.12125	0.00236236	0.741474	0.965985	1.74966
	Ranunculus sceleratus	0.213265	0.213654	0.993658	1.2366	0.0023236	0.474717	0.101012	1.98659
Ahmed wala drain	Calotropis procera	0.0121024	0.0089564	1.21365	0.0896597	0.562369	0.345621	0.076984	1.11398
	Eclipta alba	0.213695	0.0423697	0.482369	3.12547	0.263254	0.452168	0.985647	1.56469
	Phyla nodiflora	0.29354	0.15235	0.976584	2.56235	0.152346	0.965695	1.25327	2.78788
	Ranunculus sceleratus	0.212199	0.0600024	0.999857	2.11459	0.152366	0.600024	0.865957	2.12635
River site 6	Calotropis procera	0.00202123	0.00562364	0.563265	0.0452658	0.756954	0.42365	0.0895647	0.965969
	Eclipta alba	0.14589	0.031451	0.36988	3.21458	0.11985	0.45124	0.70245	1.23456
	Phyla nodiflora	0.03546	0.05986	0.34567	2.11598	0.061458	0.12546	0.36954	1.04626
	Ranunculus sceleratus	0.12368	0.08456	0.35426	2.12954	0.066954	0.33521	0.451	1.3591
River site 7	Calotropis procera	0.00124252	0.0023654	0.42369	0.074125	0.421536	0.212126	0.0424242	0.552142
	Eclipta alba	0.08542	0.020546	0.34298	2.11451	0.06542	0.42136	0.77564	1.12598
	Phyla nodiflora	0.02103	0.038561	0.3759	2.1032	0.042516	0.13259	0.27598	1.11556
	Ranunculus sceleratus	0.09654	0.07152	0.39214	1.95247	0.05798	0.30222	0.32569	0.96584

## Sheet: September
Site Name	Name of plant	Metals
Season September		Cd	Cr	Cu	Fe	Mn	Ni	Pb	Zn
		ppm	ppm	ppm	ppm	ppm	ppm	ppm	ppm
Chanabnagar River site 1 non-polluted	Calotropis procera	0.074584	0.0236599	0.58458	0.894587	0.151546	0.812966	0.243166	0.895699
	Eclipta alba	0.04121	0.02091	0.2876	0.97654	0.09237	0.2021	0.32112	1.19876
	Phyla nodiflora	0.05412	0.01003	0.22801	1.67453	0.98721	0.18654	0.34567	1.70071
	Ranunculus sceleratus	0.06988	0.04123	0.20981	1.90888	0.08765	0.31223	0.24567	1.34544
Marah drain Site 2	Calotropis procera	0.0026354	0.102365	0.78459	0.632336	0.236549	0.193265	0.120327	0.854589
	Eclipta alba	0.152543	0.02547	0.23546	3.23654	0.26534	0.50267	0.905642	1.55324
	Phyla nodiflora	0.75984	0.15644	0.82569	3.10236	0.08456	0.85274	0.94128	1.7684
	Ranunculus sceleratus	0.15245	0.020365	0.85467	2.19754	0.080569	0.82135	0.78411	1.22587
River site 2	Calotropis procera	0.00123658	0.00263598	0.336954	0.423165	0.142366	0.142365	0.193265	0.777569
	Eclipta alba	0.032051	0.018549	0.20136	0.88569	0.083264	0.18564	0.34915	1.20621
	Phyla nodiflora	0.03695	0.040599	0.17831	0.92031	0.77832	0.25431	0.37264	1.52301
	Ranunculus sceleratus	0.039542	0.03877	0.16458	1.23654	0.056487	0.20137	0.29134	1.56214
River site 3	Calotropis procera	0.00102857	0.00132935	0.152369	0.19358	0.12487	0.193587	0.132697	0.563225
	Eclipta alba	0.01205	0.012305	0.17954	0.50661	0.0835	0.1264	0.29651	1.5487
	Phyla nodiflora	0.010265	0.020365	0.1256	0.7403	0.62134	0.20354	0.27888	1.40648
	Ranunculus sceleratus	0.020155	0.029564	0.13654	1.2036	0.04215	0.13205	0.209658	1.80604
Paharang drain site	Calotropis procera	0.0042569	0.152659	0.896595	0.886597	0.465874	0.236598	0.362569	0.996315
	Eclipta alba	0.181859	0.0341203	0.392367	3.46528	0.56326	0.42365	1.26327	1.86594
	Phyla nodiflora	0.784598	0.302935	0.874589	2.8966	0.12889	0.96354	1.11294	1.88564
	Ranunculus sceleratus	0.263548	0.023548	0.895694	3.11476	0.142366	0.96365	0.865957	1.42569
River site 4	Calotropis procera	0.00223656	0.124125	0.493265	0.23697	0.21546	0.141251	0.17456	0.563268
	Eclipta alba	0.152654	0.026354	0.126354	2.10297	0.242365	0.332654	0.932154	0.819873
	Phyla nodiflora	0.419354	0.492356	0.412366	1.10237	0.124589	0.455545	1.10237	0.21257
	Ranunculus sceleratus	0.295649	0.029568	0.912478	3.42157	0.165329	0.987548	0.698549	0.879569
	Calotropis procera	0.00425698	0.152369	0.87459	0.293564	0.263254	0.193548	0.24365	0.125648
River site 5	Eclipta alba	0.112548	0.023265	0.0036265	1.29359	0.271958	0.112536	0.56945	0.45236
	Phyla nodiflora	0.34265	0.371258	0.362549	0.865987	0.152369	0.42365	0.895678	0.163254
	Ranunculus sceleratus	0.335694	0.0123654	0.54945	1.65949	0.15236	0.6594	0.895656	0.88596
Ahmed wala drain	Calotropis procera	0.0142665	0.112536	1.89654	0.125368	0.75489	0.396164	0.084562	1.85848
	Eclipta alba	0.236569	0.0451269	0.512469	3.10237	0.263595	0.485694	0.89567	1.89568
	Phyla nodiflora	0.42659	0.326546	1.12165	2.58958	0.236578	1.12622	1.16232	2.89264
	Ranunculus sceleratus	0.271666	0.075695	0.662567	2.10236	0.126537	0.612594	0.562347	2.12617
River site 6	Calotropis procera	0.0023656	0.0089659	0.769598	0.130236	0.452145	0.42153	0.077945	1.74569
	Eclipta alba	0.10265	0.014254	0.30564	3.12587	0.12598	0.3987	0.56249	1.1748
	Phyla nodiflora	0.02781	0.02659	0.17854	2.17854	0.04712	0.067159	0.35715	1.15936
	Ranunculus sceleratus	0.095135	0.035795	0.27159	2.15935	0.035159	0.35159	0.27561	1.27431
River site 7	Calotropis procera	0.0012545	0.00554214	0.77458	0.10239	0.21356	0.162346	0.0412516	0.574557
	Eclipta alba	0.13456	0.015647	0.21354	2.20314	0.10369	0.26548	0.71459	1.03645
	Phyla nodiflora	0.02158	0.04512	0.16589	1.21646	0.04125	0.069584	0.33659	1.20598
	Ranunculus sceleratus	0.089421	0.06548	0.25456	0.46985	0.051249	0.46259	0.26594	1.25456

## Sheet: December
Site Name	Name of plant	Metals
Season December		Cd	Cr	Cu	Fe	Mn	Ni	Pb	Zn
		ppm	ppm	ppm	ppm	ppm	ppm	ppm	ppm
Chanabnagar River site 1 non-polluted	Calotropis procera	0.0896598	0.056458	0.523644	0.436958	0.45298	0.896587	0.412369	0.97469
	Eclipta alba	0.04588	0.61054	0.12846	1.78549	0.088569	0.35471	0.32045	0.96317
	Phyla nodiflora	0.065421	0.00409	0.185647	1.87654	0.104591	0.36524	0.86547	2.15604
	Ranunculus sceleratus	0.095487	0.049587	0.26543	1.93216	0.096548	0.42159	0.34502	1.20654
Marah drain Site 2	Calotropis procera	0.12366	0.17459	0.869598	0.802986	0.396589	0.23265	0.27458	0.451257
	Eclipta alba	0.17801	0.14206	0.87594	3.95649	0.260254	0.58324	0.90257	1.29357
	Phyla nodiflora	0.29654	0.00856	0.76254	3.22286	0.09996	0.97455	1.13951	2.42156
	Ranunculus sceleratus	0.16025	0.095461	0.921654	3.11908	0.094564	0.89265	0.80905	1.60235
River site 2	Calotropis procera	0.102365	0.112369	0.423699	0.896599	0.163254	0.120326	0.114574	0.217457
	Eclipta alba	0.09258	0.068594	0.562349	2.45236	0.20365	0.36244	0.68235	1.14253
	Phyla nodiflora	0.16548	0.098526	0.63266	2.15235	0.16235	0.64236	0.96258	1.23541
	Ranunculus sceleratus	0.006548	0.125324	0.90325	1.95235	0.063263	0.53263	0.72036	1.1495
River site 3	Calotropis procera	0.0056598	0.0045875	0.12365	0.423659	0.112365	0.0098568	0.002365	0.102365
	Eclipta alba	0.06598	0.054326	0.43261	1.20365	0.156466	0.21684	0.53124	1.03564
	Phyla nodiflora	0.013256	0.112236	0.57265	1.4658	0.156446	0.3656	0.54121	1.10235
	Ranunculus sceleratus	0.023654	0.08865	0.82364	1.64666	0.13666	0.26646	0.612345	1.25612
Paharang drain site	Calotropis procera	0.102365	0.0046539	0.912356	0.79584	0.77459	0.34785	0.11569	1.26354
	Eclipta alba	0.192365	0.007569	0.76594	1.45236	0.295666	0.20145	0.33239	1.14569
	Phyla nodiflora	0.017459	0.0095645	1.23659	0.89236	0.26359	0.49321	0.87902	1.41236
	Ranunculus sceleratus	0.182365	0.0024365	1.29354	0.91247	0.34569	0.29451	0.194574	1.74262
River site 4	Calotropis procera	0.007345	0.002135	0.45261	0.41417	0.34206	0.13362	0.004826	0.87409
	Eclipta alba	0.11426	0.0042225	0.66913	0.75684	0.31456	0.00694	0.162542	0.86545
	Phyla nodiflora	0.0412154	0.0174953	0.9457	0.37125	0.34265	0.41241	0.4737	0.75842
	Ranunculus sceleratus	0.124129	0.001225	1.45258	1.1003	0.21632	0.21784	0.11742	0.99564
	Calotropis procera	0.002236	0.0014251	0.19245	0.14568	0.16245	0.174569	0.0026261	0.48576
River site 5	Eclipta alba	0.007659	0.0018257	0.38124	0.3526	0.13261	0.17345	0.49247	0.78421
	Phyla nodiflora	0.041096	0.015654	1.42156	0.4924	0.10293	0.004129	0.16254	0.4101
	Ranunculus sceleratus	0.004256	0.001023	0.49237	0.73026	0.10293	0.09658	0.00984	0.58496
Ahmed wala drain	Calotropis procera	0.142569	0.07856	0.55647	0.866955	0.832614	0.45556	0.19247	1.98567
	Eclipta alba	0.255587	0.060254	0.41265	3.14526	0.17458	0.97564	0.902354	1.56248
	Phyla nodiflora	0.24125	0.17451	0.95426	2.12568	0.35624	0.95134	0.652354	1.70266
	Ranunculus sceleratus	0.56254	0.059254	1.12035	2.15204	0.28564	0.51357	0.80569	1.68235
River site 6	Calotropis procera	0.10259	0.049587	0.16549	0.42165	0.41266	0.12564	0.00562	0.755844
	Eclipta alba	0.13265	0.078401	0.88774	3.00569	0.219025	0.0529	0.85604	1.14236
	Phyla nodiflora	0.075698	0.01985	0.312069	2.56289	0.07625	0.16521	0.29654	1.40265
	Ranunculus sceleratus	0.096532	0.078256	0.30654	0.14206	0.069523	0.22561	0.35621	1.09666
River site 7	Calotropis procera	0.004569	0.0074584	0.14256	0.74569	0.15324	0.002415	0.002129	0.054125
	Eclipta alba	0.21456	0.07412	0.5648	2.14587	0.15421	0.44566	0.80249	1.00549
	Phyla nodiflora	0.03456	0.05421	0.26541	2.23564	0.04012	0.13215	0.36542	1.23564
	Ranunculus sceleratus	0.045214	0.06958	0.21249	0.13259	0.04512	0.3564	0.28361	1.02159
