# Supplementary material for: Stress mitigation by riparian flora in industrial contaminated area of River Chenab Punjab, Pakistan
Source: PeerJ. 2023 Jun 28;11:e15565. doi: 10.7717/peerj.15565 (PMC10314743; doi:10.7717/peerj.15565)
Supplement: Supplemental Information 3 [file peerj-11-15565-s003.xls]

## Sheet: March
Sr. No.	Habitat	Micronutrient mg/kg
		Cd	Cr	Cu	Fe	Mn	Zn ppm	Ni ppm	Pb	Zn
		Ppm	ppm	Ppm	ppm	ppm			ppm	ppm
SS1	River site 1	0.14267	0.17854	0.52134	5.00964	0.19687	1.42579	0.82478	1.96524	1.40568
	Chanabnagar
SS2	Drain1 Marah Chiniot drain	0.33654	0.23155	2.56185	5.39648	0.36957	3.85674	0.99564	5.56474	2.03654
SS3	River site 2 Chiniot	0.01564	0.12567	1.02658	1.15687	0.57584	1.59547	0.95884	3.26981	1.54261
SS4	River site 3 Chiniot	0.01246	0.15427	0.69564	4.89654	0.1857	1.78954	0.6428	2.10658	1.46575
SS5	Drain2 Paharang drain	0.27134	0.1854	1.05124	4.20548	0.42965	4.09217	1.32544	3.84675	2.35176
SS6	River site 4 Bhawana	0.12547	0.14257	0.62458	2.64321	0.51457	1.88654	0.85649	1.9758	1.87444
SS7	River site 5 Bhawana	0.08164	0.13298	0.99568	4.48555	0.25498	1.56544	0.96523	1.32657	1.56544
SS8	Drain3 Ahmed wala Jhang	0.35414	0.2648	1.96644	4.99564	0.31285	1.85647	1.05684	6.21546	1.85647
SS9	River site 6 Jhang	0.11254	0.14857	0.78464	5.41957	0.26599	1.59685	0.69544	1.69543	1.59685
SS10	River site 7 Jhang	0.10298	0.10987	0.78234	3.18754	0.29566	1.95784	0.54211	1.02035	1.44568

## Sheet: June
Sr. No.	Habitat	Micronutrient mg/kg
		Cd	Cr	Cu	Fe	Mn	Zn ppm	Ni ppm	Pb	Zn
		Ppm	ppm	Ppm	ppm	ppm			ppm	ppm
SS1	River site 1	0.11289	0.15685	0.50013	4.10981	0.69681	1.4157	0.71243	1.90521	1.42856
	Chanabnagar
SS2	Drain1 Marah Chiniot drain	0.31566	0.24185	2.54181	4.35646	0.39907	3.87564	1.19561	4.15644	2.13659
SS3	River site 2 Chiniot	0.01724	0.11061	1.12558	1.12567	0.567784	1.57597	0.90804	3.16087	1.50267
SS4	River site 3 Chiniot	0.01145	0.14432	0.67511	4.80614	0.16987	1.70105	0.6126	2.11068	1.42505
SS5	Drain2 Paharang drain	0.28124	0.18524	1.15199	4.21549	0.4096	2.35176	1.61025	3.81679	2.25177
SS6	River site 4 Bhawana	0.11549	0.1225	0.61456	2.62431	0.50456	1.08653	0.89641	1.9256	1.88421
SS7	River site 5 Bhawana	0.08267	0.12208	0.98568	4.72681	0.23491	1.52548	0.93521	1.34347	1.54549
SS8	Drain3 Ahmed wala Jhang	0.40324	0.22154	2.83245	5.52364	0.39685	1.95675	0.94126	4.36954	1.42579
SS9	River site 6 Jhang	0.10024	0.12857	0.77744	4.40957	0.23591	1.54685	0.64541	1.62533	1.49989
SS10	River site 7 Jhang	0.10291	0.10781	0.76237	3.13751	0.21966	1.92789	0.53213	1.02133	1.67568

## Sheet: September
Sr. No.	Habitat	Micronutrient mg/kg
		Cd	Cr	Cu	Fe	Mn	Zn ppm	Ni ppm	Pb	Zn
		Ppm	ppm	Ppm	ppm	ppm			ppm	ppm
SS1	River site 1	0.1225	0.16422	0.49856	5.00775	0.39021	1.39877	0.79002	1.30234	1.35201
	Chanabnagar
SS2	Drain1 Marah Chiniot drain	0.45092	0.22459	2.88618	3.10996	0.305646	2.95671	0.95668	5.77644	1.99364
SS3	River site 2 Chiniot	0.01775	0.102696	0.132674	1.14367	0.49768	1.48765	0.605821	3.2042	1.49026
SS4	River site 3 Chiniot	0.010987	0.34529	0.64501	3.29876	0.21897	1.9007	0.70459	1.80965	1.33241
SS5	Drain2 Paharang drain	0.28076	0.14321	0.85029	3.78452	0.778622	3.21098	1.45674	2.99231	2.95234
SS6	River site 4 Bhawana	0.15687	0.13245	0.71209	2.20906	0.38671	1.10239	0.80988	0.90718	1.54314
SS7	River site 5 Bhawana	0.054312	0.10165	0.58745	2.21097	0.198718	1.26761	0.49876	0.57066	1.39457
SS8	Drain3 Ahmed wala Jhang	0.312456	0.24389	2.11478	5.10213	0.334521	1.40998	2.09871	5.39787	1.72349
SS9	River site 6 Jhang	0.12004	0.156718	0.98765	3.20981	0.21276	1.59689	0.623435	2.60222	1.11099
SS10	River site 7 Jhang	0.11982	0.13245	0.712901	2.5612	0.34765	1.50897	0.31981	0.98721	1.12901

## Sheet: December
Sr. No.	Habitat	Micronutrient mg/kg
		Cd	Cr	Cu	Fe	Mn	Zn ppm	Ni ppm	Pb	Zn
		Ppm	ppm	Ppm	ppm	ppm			ppm	ppm
SS1	River site 1	0.16891	0.19244	0.40981	5.12431	0.27239	1.33268	0.84356	1.14765	1.13902
	Chanabnagar
SS2	Drain1 Marah Chiniot drain	0.367896	0.19201	2.5118	5.41903	0.334468	3.80098	0.94015	4.67896	1.19871
SS3	River site 2 Chiniot	0.011123	0.165785	1.56781	1.28403	0.57584	1.20301	0.768098	2.34567	1.09814
SS4	River site 3 Chiniot	0.01398	0.13977	0.775645	2.89065	0.1857	1.92102	0.61987	1.90871	0.87652
SS5	Drain2 Paharang drain	0.134511	0.21677	1.78651	4.34567	0.56789	3.90002	1.1129	3.20199	2.87654
SS6	River site 4 Bhawana	0.13456	0.17542	0.56781	2.30214	0.789011	1.54329	0.76589	1.56432	1.90786
SS7	River site 5 Bhawana	0.09876	0.14568	0.78905	5.1346	0.227654	1.52145	0.91234	1.44567	1.45378
SS8	Drain3 Ahmed wala Jhang	0.47601	0.28701	2.40988	5.34219	0.432782	1.90876	1.1235	5.98765	1.76757
		0.40324	0.22154	2.83245	5.52364	0.39685	1.95675	0.94126	4.36954	1.42579
SS9	River site 6 Jhang	0.13156	0.167788	0.790046	5.31891	0.23678	1.43526	0.616474	1.72876	1.62871
SS10	River site 7 Jhang	0.12675	0.12781	0.7198	3.11091	0.27865	1.21897	0.59876	2.09876	1.21098
