# Supplementary material for: Stress mitigation by riparian flora in industrial contaminated area of River Chenab Punjab, Pakistan
Source: PeerJ. 2023 Jun 28;11:e15565. doi: 10.7717/peerj.15565 (PMC10314743; doi:10.7717/peerj.15565)
Supplement: Supplemental Information 4 — Water physicochemical parameters [file peerj-11-15565-s004.xlsx]

## Sheet: w march
Sr.	Name	pH	EC	COD	BOD	Ca+Mg	Sodium	Bicorbonate	Carbonate	Chlorides	SAR	TDS
			μS/cm	mg/l	mg/l	mEq/L	mEq/L	mEq/L	mEq/L	mEq/L		μS/cm
1	River site 1	7.1	18	126	162	4.7	32	6.01	5.1	12.033	20.91	790
	Chanabnagar
2	Marah Chiniot drain1	7.8	47.53	319	235	9.7	375	14	15.31	33.12	170.45	1494
3	River site 2 Chiniot	8.3	24.12	267	178	8.7	38	7.2	9.8	23.54	18.26	850
4	River site 3 Chiniot	8.2	34.11	239	189	8.4	36	6.4	8.56	21.67	17.64	878
5	Paharang drain Drain2	8.8	48.4	310	312	11.09	520	21	17.11	35.78	221.27	1598
6	River site 4 Bhawana	7.1	36	217	215	9.03	30	18.1	9.08	29.1	13.95	865
7	River site 5 Bhawana	7.2	23.45	189	212	8.9	29	15.3	8.73	27.34	13.8	945
8	Ahmad wala Drain3	8.3	45.93	329	295	10.98	1567	19.1	17.2	34.95	669.65	1798
9	River site 6 Jhang	7.3	29.6	211	195	8.7	152	17.8	4.5	25.29	73.07	887
10	River site 7 Jhang	7.2	20.6	176	187	9.06	150	18.11	6.9	23.9	72.81	870

## Sheet: w june
Sr.	Name	pH	EC	COD	BOD	Ca+Mg	Sodium	Bicorbonate	Carbonate	Chlorides	SAR	TDS
			μS/cm	mg/l	mg/l	mEq/L	mEq/L	mEq/L	mEq/L	mEq/L		μS/cm
									5.89
1	River site 1	7.2	20	132	162	5.9	32	7.12	5.1	13.11	18.71	810
	Chanabnagar
2	Marah Chiniot drain1	7.8	49.45	289	243	9.8	410	16	17.12	34.67	185.52	1567
3	River site 2 Chiniot	8.2	22.34	260	167	8.9	39	7.7	9.9	24.01	18.26	870
4	River site 3 Chiniot	8.3	30.99	215	175	8.6	38	7.5	8.78	22.89	18.57	760
5	Paharang drain Drain2	8.7	49.7	295	287	12.35	577	24	19.11	34.12	232.66	1489
6	River site 4 Bhawana	7.1	25	190	234	9.6	29	19.97	9.1	28.1	13.24	780
7	River site 5 Bhawana	7.1	26.02	187	220	8.9	34	16.7	8.73	26.1	16.19	987
8	Ahmad wala Drain3	8.2	48	335	289	11.1	1476	21.01	18.03	35.6	628.08	1690
9	River site 6 Jhang	7.2	30.1	190	197	8.2	151	18.06	5.34	24.27	74.75	800
10	River site 7 Jhang	7.2	22	179	189	9.06	154	18.19	7.12	22.34	72.64	856

## Sheet: w septembr
Sr.	Name	pH	EC	COD	BOD	Ca+Mg	Sodium	Bicorbonate	Carbonate	Chlorides	SAR	TDS
			μS/cm	mg/l	mg/l	mEq/L	mEq/L	mEq/L	mEq/L	mEq/L		μS/cm
1	River site 1	7.1	19	135	145	5.1	32	5.56	5.2	12.24	20.12	792
	Chanabnagar
2	Marah Chiniot drain1	7.6	44	321	234	9.9	391	13	16.22	34.21	176.12	1323
3	River site 2 Chiniot	8.1	27	289	145	8.7	38	6	9.5	24.88	18.26	887
4	River site 3 Chiniot	8.3	28	276	156	8.7	36	7.1	8.21	22.34	17.3	856
5	Paharang drain Drain2	8.4	49.57	310	321	10.9	520	19.12	15.64	32.87	223.17	1344
6	River site 4 Bhawana	7.2	34	222	210	9.3	30	17.2	9.07	30.1	13.95	789
7	River site 5 Bhawana	7.1	22.65	155	212	8.4	29	16	8.23	26.22	14.21	944
8	Ahmad wala Drain3	8.1	42.11	322	295	9.19	1567	21	15.55	31.99	732.24	1532
9	River site 6 Jhang	7.2	36	231	178	9.11	152	18.9	4.88	25.29	71.36	876
10	River site 7 Jhang	7.2	25.5	134	166	8.72	150	19	7	22.54	72.11	835

## Sheet: w decmbr
Sr.	Name	pH	EC	COD	BOD	Ca+Mg	Sodium	Bicorbonate	Carbonate	Chlorides	SAR	TDS
			μS/cm	mg/l	mg/l	mEq/L	mEq/L	mEq/L	mEq/L	mEq/L		μS/cm
1	River site 1	7.1	19	128	167	4.89	37	6.2	5.35	12.167	23.66	885
	Chanabnagar
2	Marah Chiniot drain1	7.9	48.53	320	235	9.6	391	12	15.31	33.12	178.53	1290
3	River site 2 Chiniot	8.4	25.62	289	176	8.4	38	7.4	9.7	23.54	18.62	830
4	River site 3 Chiniot	8.3	36.61	240	189	8.4	37	6.9	8.86	21.67	18.13	889
5	Paharang drain Drain2	8.7	45.4	290	327	10.19	510	20	17.21	35.78	226.66	1002
6	River site 4 Bhawana	7.2	39.1	219	209	9.73	60	16.1	9.09	29.1	27.27	875
7	River site 5 Bhawana	7.1	27.49	189	211	8.7	45	14.3	8.72	27.34	21.63	985
8	Ahmad wala Drain3	8.2	44.93	315	267	10.1	1210	18.1	17.7	34.95	540.17	1698
9	River site 6 Jhang	7.5	26.69	221	165	8.6	154	17.8	4.8	25.29	74.39	668
10	River site 7 Jhang	7.4	21.6	186	179	9.16	153	17.11	6.6	23.9	71.49	789
