# Supplementary material for: Stress mitigation by riparian flora in industrial contaminated area of River Chenab Punjab, Pakistan
Source: PeerJ. 2023 Jun 28;11:e15565. doi: 10.7717/peerj.15565 (PMC10314743; doi:10.7717/peerj.15565)
Supplement: Supplemental Information 5 — Soil physicochemical parameters [file peerj-11-15565-s005.xlsx]

## Sheet: S March
Sr. No.	Habitat	pH	EC	Micronutrient mg/kg
			mS cm-1
				Organic matter	P	K	Saturation
SS1	River site 1	7.1	13	1.25	8.05	110	41
	Chanabnagar
SS2	Marah Chiniot drain	7.8	10.53	2.13	21.8	240	42
SS3	River site 2 Chiniot	8.3	12.87	1.35	9.75	189	42
SS4	River site 3 Chiniot	8.3	10.34	1.42	10.5	124	41
SS5	Paharang drain	7.9	9.4	2.17	28.5	245	42
SS6	River site 4 Bhawana	7.4	11.24	1.24	6.06	215	42
SS7	River site 5 Bhawana	7.2	12.45	1.13	9.72	178	42
SS8	Ahmed wala drain Jhang	8.1	12.93	2.18	27.67	238	42
SS9	River site 6 Jhang	7.2	14.6	1.14	11.68	137	42
SS10	River site 7 Jhang	7.1	12.3	1.17	11.6	124	42

## Sheet: S June
Sr. No.	Habitat	pH	EC	Micronutrient mg/kg
			mS cm-1
				Organic matter	P	K	Saturation
SS1	River site 1	7.1	14	1.27	8.09	113	39
	Chanabnagar
SS2	Marah Chiniot drain	7.7	10.5	2.1	20.09	233	41
SS3	River site 2 Chiniot	8.2	12.85	1.37	8.9	196	42
SS4	River site 3 Chiniot	8.4	9.56	1.58	9.89	176	41
SS5	Paharang drain	7.8	9.9	2.13	26.7	265	41
SS6	River site 4 Bhawana	7.4	11.22	1.34	6.78	210	42
SS7	River site 5 Bhawana	7.2	12.34	1.23	8.73	187	42
SS8	Ahmed wala drain Jhang	8	13	2.19	27.61	235	42
SS9	River site 6 Jhang	7.2	14.8	1.23	11.75	139	42
SS10	River site 7 Jhang	7.1	12.38	1.19	11.7	120	42

## Sheet: S SEptember
Sr. No.	Habitat	pH	EC	Micronutrient mg/kg
			mS cm-1
				Organic matter	P	K	Saturation
SS1	River site 1	7.1	11	1.23	8.15	124	41
	Chanabnagar
SS2	Marah Chiniot drain	7.8	11.23	2.17	22	231	42
SS3	River site 2 Chiniot	8.3	12.43	1.38	9.12	192	42
SS4	River site 3 Chiniot	8.3	10.32	1.44	10.5	156	41
SS5	Paharang drain	7.9	9.1	2.13	29	243	39
SS6	River site 4 Bhawana	7.4	10.99	1.89	5.89	211	42
SS7	River site 5 Bhawana	7.2	12.56	1.12	9.82	173	41
SS8	Ahmed wala drain Jhang	8.2	12.65	2.19	28	219	41
SS9	River site 6 Jhang	7.2	13.91	1.32	12.1	154	42
SS10	River site 7 Jhang	7.1	12.43	1.21	12.1	125	42

## Sheet: S December
Sr. No.	Habitat	pH	EC	Micronutrient mg/kg
			mS cm-1
				Organic matter	P	K	Saturation
SS1	River site 1	7.1	15	2.1	7.66	102	41
	Chanabnagar
SS2	Marah Chiniot drain	7.8	10.52	2.22	20.9	220	42
SS3	River site 2 Chiniot	8.3	12.99	1.39	9.87	188	42
SS4	River site 3 Chiniot	8.1	1.36	2.12	9.8	167	39
SS5	Paharang drain	7.9	9.1	2.12	27	212	42
SS6	River site 4 Bhawana	7.4	11.25	1.21	6.12	202	42
SS7	River site 5 Bhawana	7.2	12.47	1.15	9.87	199	42
SS8	Ahmed wala drain Jhang	8.1	11.25	2.18	25.45	236	42
SS9	River site 6 Jhang	7.2	14.14	1.12	10.92	138	42
SS10	River site 7 Jhang	7.1	12.31	1.71	11.21	134	42
