# Supplementary material for: Stress mitigation by riparian flora in industrial contaminated area of River Chenab Punjab, Pakistan
Source: PeerJ. 2023 Jun 28;11:e15565. doi: 10.7717/peerj.15565 (PMC10314743; doi:10.7717/peerj.15565)
Supplement: Supplemental Information 6 — soil and water combined [file peerj-11-15565-s006.xlsx]

## Sheet: Mar
	S1	S2	S3	S4	S5	S6	S7	S8	S9	S10
pH-W	7.1	7.8	8.3	8.2	8.8	7.1	7.2	8.3	7.3	7.2
EC-W	18	47.53	24.12	34.11	48.4	36	23.45	45.93	29.6	20.6
COD	126	319	267	239	310	217	189	329	211	176
BOD	162	235	178	189	312	215	212	295	195	187
Ca+Mg	4.7	9.7	8.7	8.4	11.09	9.03	8.9	10.98	8.7	9.06
Na	32	375	38	36	520	30	29	1567	152	150
HCO3	6.01	14	7.2	6.4	21	18.1	15.3	19.1	17.8	18.11
CO3	5.1	15.31	9.8	8.56	17.11	9.08	8.73	17.2	4.5	6.9
Cl	12.033	33.12	23.54	21.67	35.78	29.1	27.34	34.95	25.29	23.9
SAR		170.45	18.26	17.64	221.27	13.95	13.8	669.65	73.07	72.81
TDS	790	1494	850	878	1598	865	945	1798	887	870
pH-S	7.1	7.8	8.3	8.3	7.9	7.4	7.2	8.1	7.2	7.1
EC-S	13	10.53	12.87	10.34	9.4	11.24	12.45	12.93	14.6	12.3
OM	1.25	2.13	1.35	1.42	2.17	1.24	1.13	2.18	1.14	1.17
P	8.05	21.8	9.75	10.5	28.5	6.06	9.72	27.67	11.68	11.6
K	110	240	189	124	245	215	178	238	137	124
Sat	41	42	42	41	42	42	42	42	42	42

## Sheet: Jun
	S1	S2	S3	S4	S5	S6	S7	S8	S9	S10
pH-W	7.2	7.8	8.2	8.3	8.7	7.1	7.1	8.2	7.2	7.2
EC-W	20	49.45	22.34	30.99	49.7	25	26.02	48	30.1	22
COD	132	289	260	215	295	190	187	335	190	179
BOD	162	243	167	175	287	234	220	289	197	189
Ca+Mg	5.9	9.8	8.9	8.6	12.35	9.6	8.9	11.1	8.2	9.06
Na	32	410	39	38	577	29	34	1476	151	154
HCO3	7.12	16	7.7	7.5	24	19.97	16.7	21.01	18.06	18.19
CO3	5.1	17.12	9.9	8.78	19.11	9.1	8.73	18.03	5.34	7.12
Cl	13.11	34.67	24.01	22.89	34.12	28.1	26.1	35.6	24.27	22.34
SAR	18.71	185.52	18.26	18.57	232.66	13.24	16.19	628.08	74.75	72.64
TDS	810	1567	870	760	1489	780	987	1690	800	856
pH-S	7.1	7.7	8.2	8.4	7.8	7.4	7.2	8	7.2	7.1
EC-S	14	10.5	12.85	9.56	9.9	11.22	12.34	13	14.8	12.38
OM	1.27	2.1	1.37	1.58	2.13	1.34	1.23	2.19	1.23	1.19
P	8.09	20.09	8.9	9.89	26.7	6.78	8.73	27.61	11.75	11.7
K	113	233	196	176	265	210	187	235	139	120
Sat	39	41	42	41	41	42	42	42	42	42

## Sheet: Sep
	S1	S2	S3	S4	S5	S6	S7	S8	S9	S10
pH-W	7.1	7.6	8.1	8.3	8.4	7.2	7.1	8.1	7.2	7.2
EC-W	19	44	27	28	49.57	34	22.65	42.11	36	25.5
COD	135	321	289	276	310	222	155	322	231	134
BOD	145	234	145	156	321	210	212	295	178	166
Ca+Mg	5.1	9.9	8.7	8.7	10.9	9.3	8.4	9.19	9.11	8.72
Na	32	391	38	36	520	30	29	1567	152	150
HCO3	5.56	13	6	7.1	19.12	17.2	16	21	18.9	19
CO3	5.2	16.22	9.5	8.21	15.64	9.07	8.23	15.55	4.88	7
Cl	12.24	34.21	24.88	22.34	32.87	30.1	26.22	31.99	25.29	22.54
SAR	20.12	176.12	18.26	17.3	223.17	13.95	14.21	732.24	71.36	72.11
TDS	792	1323	887	856	1344	789	944	1532	876	835
pH-S	7.1	7.8	8.3	8.3	7.9	7.4	7.2	8.2	7.2	7.1
EC-S	11	11.23	12.43	10.32	9.1	10.99	12.56	12.65	13.91	12.43
OM	1.23	2.17	1.38	1.44	2.13	1.89	1.12	2.19	1.32	1.21
P	8.15	22	9.12	10.5	29	5.89	9.82	28	12.1	12.1
K	124	231	192	156	243	211	173	219	154	125
Sat	41	42	42	41	39	42	41	41	42	42

## Sheet: Dec
	S1	S2	S3	S4	S5	S6	S7	S8	S9	S10
pH-W	7.1	7.9	8.4	8.3	8.7	7.2	7.1	8.2	7.5	7.4
EC-W	19	48.53	25.62	36.61	45.4	39.1	27.49	44.93	26.69	21.6
COD	128	320	289	240	290	219	189	315	221	186
BOD	167	235	176	189	327	209	211	267	165	179
Ca+Mg	4.89	9.6	8.4	8.4	10.19	9.73	8.7	10.1	8.6	9.16
Na	37	391	38	37	510	60	45	1210	154	153
HCO3	6.2	12	7.4	6.9	20	16.1	14.3	18.1	17.8	17.11
CO3	5.35	15.31	9.7	8.86	17.21	9.09	8.72	17.7	4.8	6.6
Cl	12.167	33.12	23.54	21.67	35.78	29.1	27.34	34.95	25.29	23.9
SAR	23.66	178.53	18.62	18.13	226.66	27.27	21.63	540.17	74.39	71.49
TDS	885	1290	830	889	1002	875	985	1698	668	789
pH-S	7.1	7.8	8.3	8.1	7.9	7.4	7.2	8.1	7.2	7.1
EC-S	15	10.52	12.99	1.36	9.1	11.25	12.47	11.25	14.14	12.31
OM	2.1	2.22	1.39	2.12	2.12	1.21	1.15	2.18	1.12	1.71
P	7.66	20.9	9.87	9.8	27	6.12	9.87	25.45	10.92	11.21
K	102	220	188	167	212	202	199	236	138	134
Sat	41	42	42	39	42	42	42	42	42	42
